# Supplementary material
Source: PubMed Central journal article supplement (PMC8686845)
Supplement: JCOPDF-8-474-s001.pdf [file JCOPDF-8-474-s001.pdf]

## **Online Supplement**

### **Self-reported COPD Medication Use and Adherence in the COPD Foundation Patient-Powered Registry Network**

Cara B. Pasquale, MPH<sup>1</sup> Radmila Choate, PhD, MPH,<sup>1,2</sup> Gretchen McCreary, MA<sup>1</sup> Richard A. Mularski, MD, MSHS, MCR<sup>3,4,5</sup> William Clark, BS<sup>1</sup> MaryEllen Houlihan<sup>1</sup> Elisha Malanga, BS<sup>1</sup> Barbara P. Yawn, MD, MSc, MSPH<sup>1,6</sup>

<sup>1</sup>COPD Foundation, Inc, Washington, DC, United States

<sup>2</sup>Department of Epidemiology, University of Kentucky College of Public Health, Lexington, Kentucky, United States

<sup>3</sup>Kaiser Permanente Bernard J. Tyson School of Medicine, Pasadena, California, United States

<sup>4</sup>Oregon Health & Science University, Portland, Oregon, United States

<sup>5</sup>Center for Ethics in Health Care, Oregon Health & Science University, Clackamas, Oregon, United States

<sup>6</sup>Family and Community Health, University of Minnesota, Minneapolis, Minnesota, United States

## **Supplemental Figure.**

**2c. How often do you use this medicine (input name) for your COPD?**

- As needed
- Once a week
- Once a day
- Twice a day
- Three times a day
- Four or more times a day

**2d. Has any health care person shown you how to use this inhaler/puffer?**

- Yes
- No
- I don't remember

**2e. Did any health care person ask you to show them how you use this inhaler/puffer?**

- Yes
- No
- I don't remember

**2f. Taking inhalers/puffers exactly as prescribed can be difficult for many reasons. Are you able to take this inhaler/puffer (input name) as prescribed by your doctor or nurse or physician's assistant?**

- Yes, all or almost all the time
- Yes, most of the time
- Yes, sometimes when I think I need it
- No, not often
- No, never
